# Supplementary material
Source: PubMed Central journal article supplement (PMC3934373)
Supplement: cb400658k_si_001.pdf [file cb400658k_si_001.pdf]

## Supporting Information

### **Cupric yersiniabactin is a virulence-associated superoxide dismutase mimic.**

Kaveri S. Chaturvedi<sup>1,2,3</sup>, Chia S. Hung<sup>1,2,3</sup>, Daryl E. Giblin<sup>4</sup>, Anthony M. Austin<sup>5</sup>, Mary C. Dinauer<sup>5,6</sup>, Saki Urushidani<sup>2</sup>, Jeffrey P. Henderson<sup>1,2,3\*</sup>

<sup>1</sup>Center for Women's Infectious Diseases Research, <sup>2</sup>Division of Infectious Diseases, <sup>3</sup>Department of Internal Medicine, <sup>4</sup>Department of Chemistry, <sup>5</sup>Department of Pediatrics, <sup>6</sup>Department of Pathology and Immunology, Washington University School of Medicine, St. Louis, Missouri, United States of America

\* Corresponding author:

Center for Women's Infectious Disease Research  
Box 8051 Washington University School of Medicine,  
660 S. Euclid Ave., St. Louis, MO 63110  
Phone: +13143627250  
Fax: +13143623203  
E-mail: [jhenderson@DOM.wustl.edu](mailto:jhenderson@DOM.wustl.edu)

This file includes

- Supplementary Figures

## Supplementary Figures

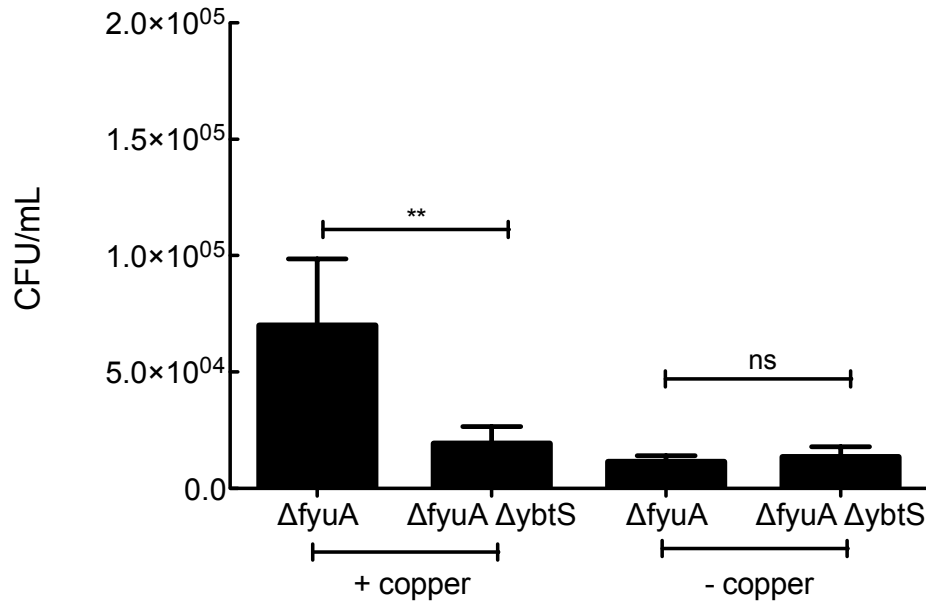

**Supplementary Figure S1. Ybt import is not required for uropathogen survival within copper-replete RAW264.7 macrophages.** RAW264.7 macrophages were infected with the uropathogen UTI89, and isogenic  $\Delta fyuA$  or  $\Delta fyuA\Delta ybtS$  mutants following supplementation with or without 20  $\mu$ M copper sulfate. Intracellular bacterial survival after 1 hour was expressed as a difference from initial internalized *E. coli*. Similar to UTI89, the yersiniabactin expressing mutant  $\Delta fyuA$  was significantly ( $p=0.001$ , *t*-test) more viable than the isogenic, yersiniabactin-deficient  $\Delta fyuA\Delta ybtS$  mutant.

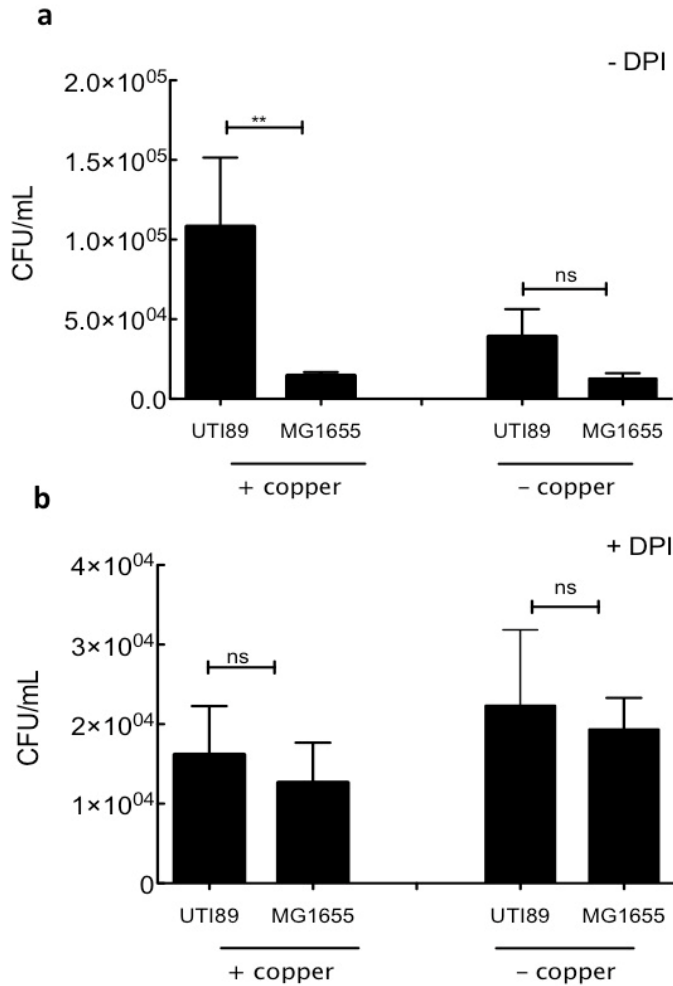

**Supplementary Figure S2. The commensal strain MG1655 cannot modulate copper-dependent bactericidal activity of RAW 264.7 cells.** RAW264.7 macrophages were treated with 20  $\mu$ M diphenyleneiodonium chloride (DPI) in the presence or absence of 20  $\mu$ M copper prior to exposure to *E. coli*. Survival of MG1655 one hour post incubation in RAW264.7 cells is indicated. The survival phenotype is not observed for the commensal strain, suggesting that Ybt expression predominantly contributes to the survival phenotype observed in UTI89. Both UTI89 and MG1655 are equally susceptible to the bactericidal activity of DPI treated RAW264.7 cells regardless of copper treatment. These results were combined from four independent experiments.

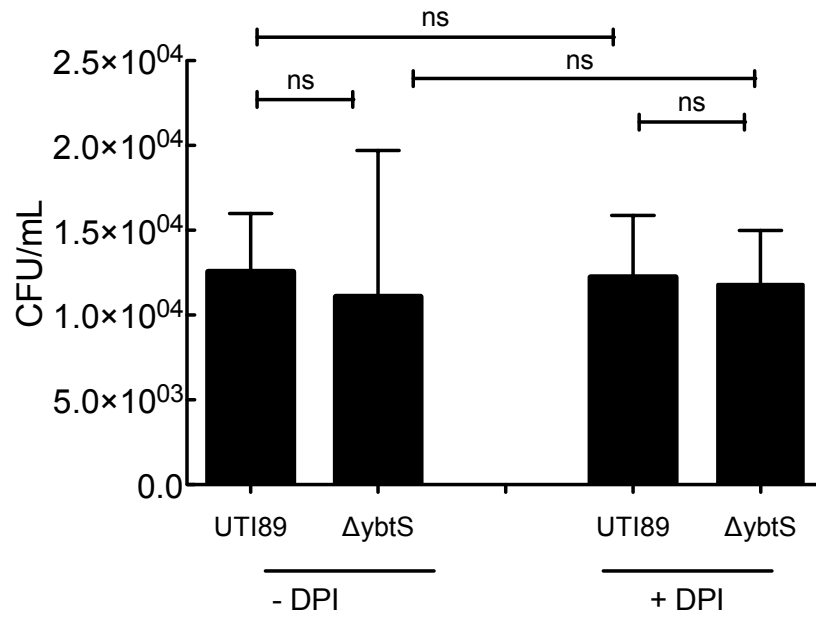

**Supplementary Figure S3. Ybt expression does not promote pathogen survival in RAW264.7 cells without copper treatment.** RAW264.7 macrophages were infected for one hour in the presence or absence of 20  $\mu$ M DPI without copper supplementation. DPI treatment did not restore Cu(II)-Ybt dependent survival advantage in the absence of copper. These results were combined from four independent experiments.

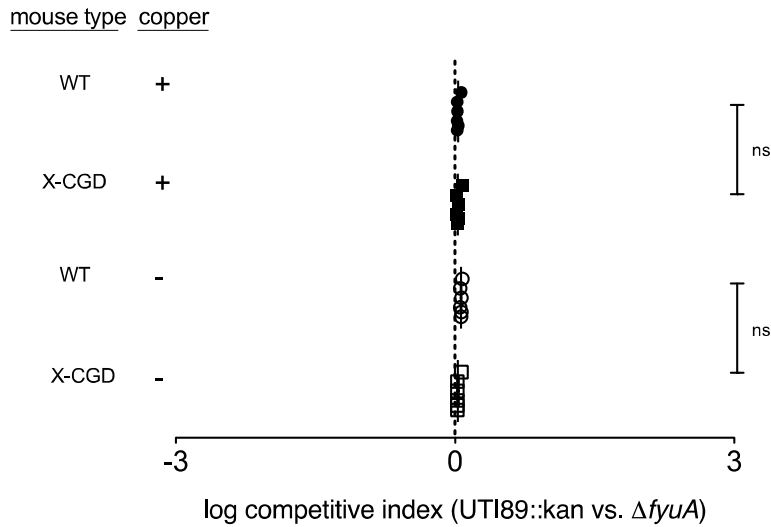

**Supplemental Figure S4. Ybt synthesis, not import, contributes to UTI89 survival advantage in phagocytes.** Survival of UTI89 $\Delta ybtS$  and UTI89 $\Delta fyuA$  following competitive co-infection with wild type UTI89 was assessed in resident peritoneal macrophages from wild type and X-CGD ( $gp91^{phox^{-/-}}$ ) mice. CIs determined using the yersiniabactin uptake mutant UTI89 $\Delta fyuA$  revealed CIs of zero with both cell types under all conditions, indicating that yersiniabactin biosynthesis, not uptake, primarily contribute to the UTI89 $\Delta ybtS$  survival phenotype.

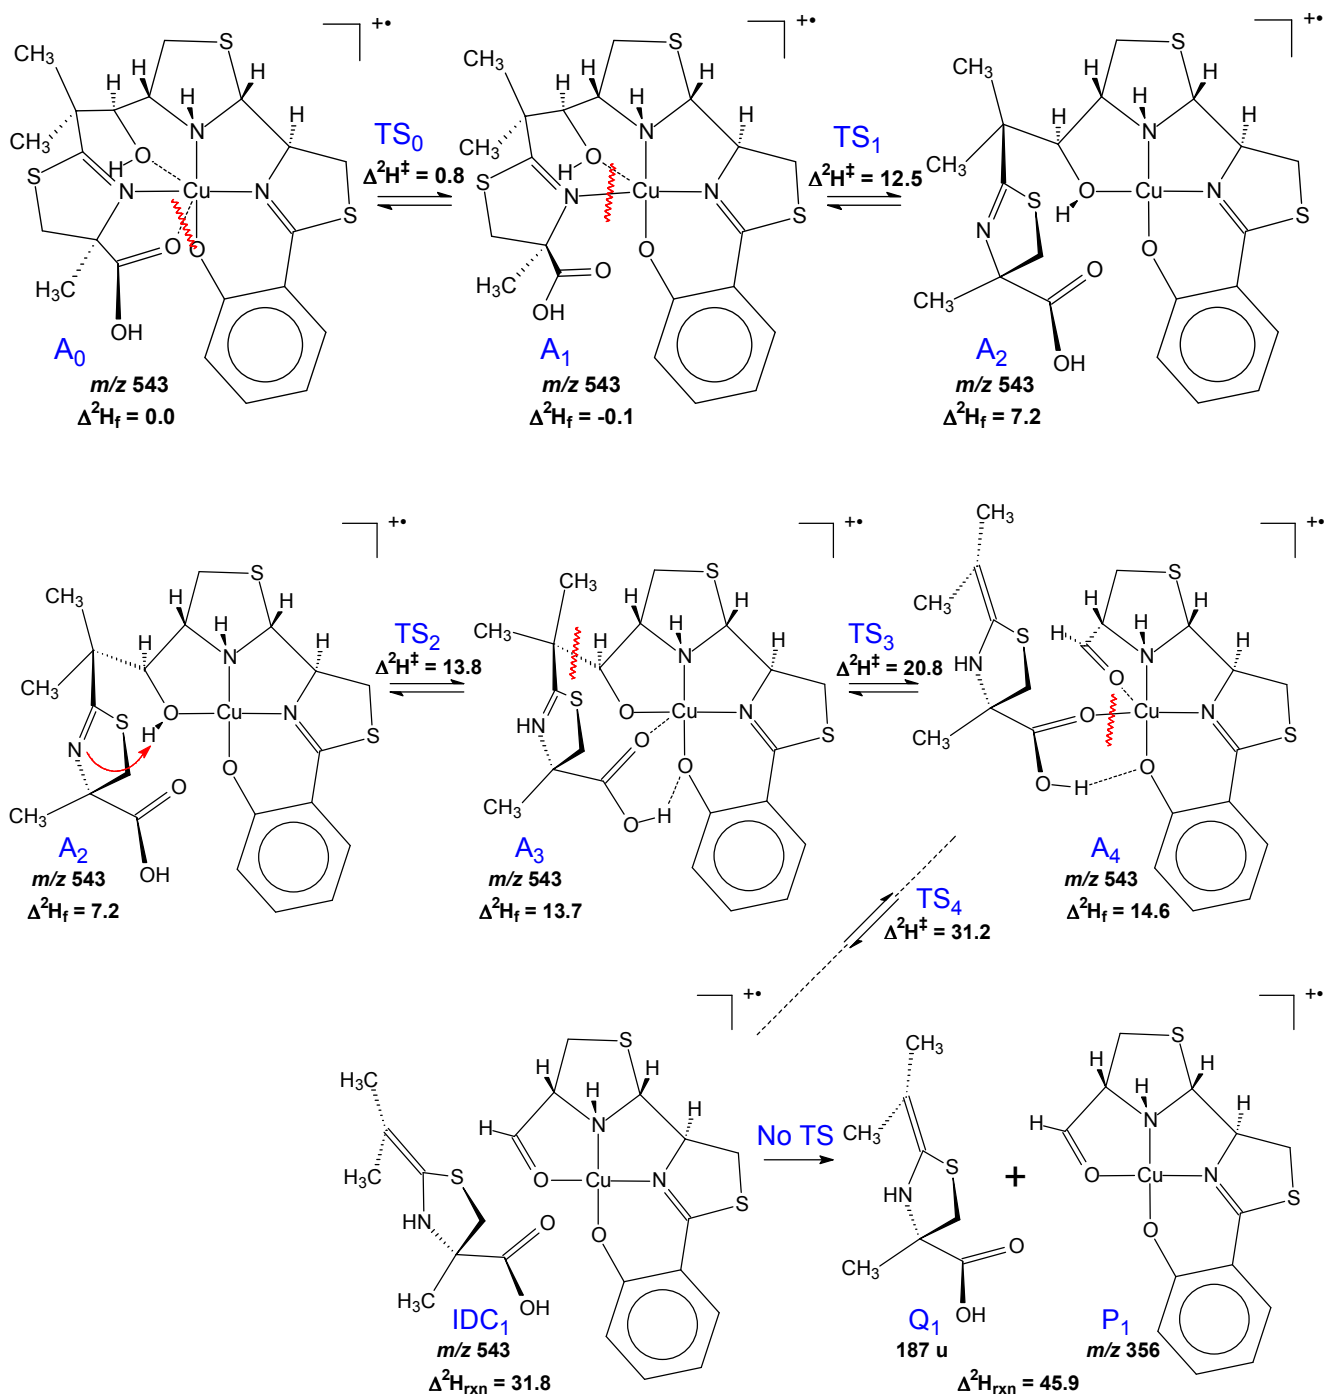

**Supplemental Figure S5. Proposed CID fragmentation mechanism.** Ybt fragmentation pattern is consistent with the rearrangement of the C13-C14 bond and loss of the third, carboxylated thiazoline

ring. Cu(II)-Ybt complexes feature a core that is essentially square planar comprised of lone pairs from the salicylate O (ring 1) and from the N of rings 2 and 3 and another pair from ring 4 N or secondary OH. In addition to the square-planar core, there are long-bonded and interactions in some species with the Cu(II) ion; these bonds along with hydrogen bonds are shown by undirected dashes. (Relative calculated enthalpies of minima and transition states are given in kcal/mol.)

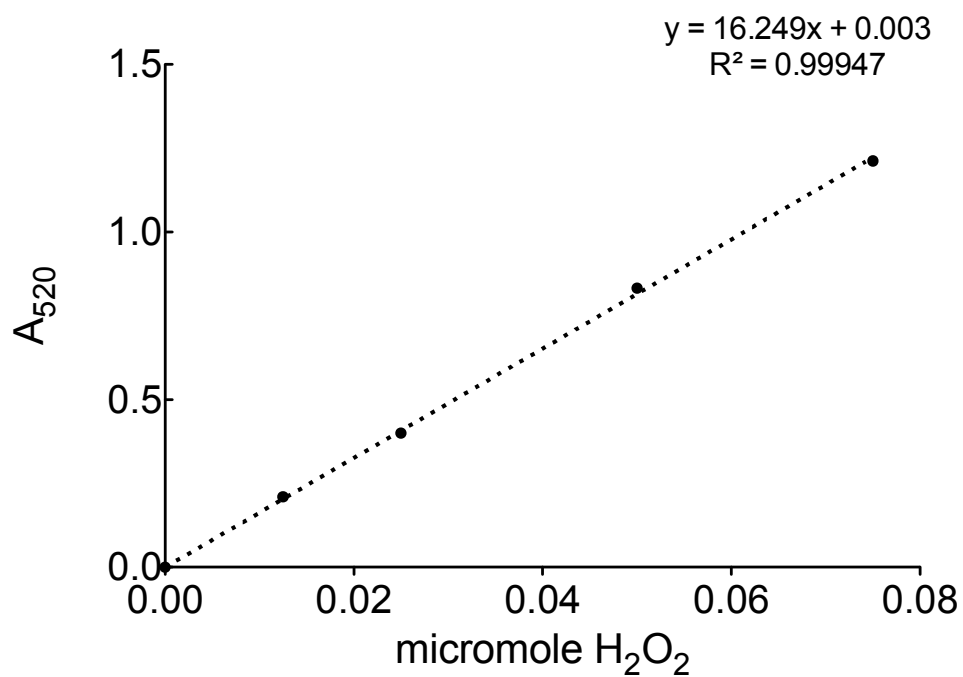

**Supplementary Figure S6. Calibration curve for the determination of hydrogen peroxide concentrations. Equation of the line and regression from linearity are indicated.**



**Table 1:** UTI89 mutant strains used in this study

| <b>strain</b>                                   | <b>gene function</b>                                                                    | <b>Reference</b> |
|-------------------------------------------------|-----------------------------------------------------------------------------------------|------------------|
| UTI89                                           | Wild type <i>E. coli</i>                                                                | (1)              |
| UTI89::kan                                      | kanamycin resistance                                                                    | This paper       |
| UTI89 $\Delta$ <i>ybtS</i>                      | salicylate synthase, yersiniabactin biosynthesis                                        | (2)              |
| UTI89 $\Delta$ <i>fyuA</i>                      | yersiniabactin transport                                                                | (2)              |
| UTI89 $\Delta$ <i>fyuA</i> $\Delta$ <i>ybtS</i> | salicylate synthase, yersiniabactin biosynthesis,<br>yersiniabactin transport           | (2)              |
| UTI89 $\Delta$ <i>entB</i>                      | isochorismate lyase, catecholate siderophore<br>(enterobactin/salmochelin) biosynthesis | (2)              |

## References

1. Hunstad, D. A., Justice, S. S., Hung, C. S., Lauer, S. R., and Hultgren, S. J. (2005) Suppression of bladder epithelial cytokine responses by uropathogenic *Escherichia coli*, *Infect Immun* 73, 3999-4006.
2. Chaturvedi, K. S., Hung, C. S., Crowley, J. R., Stapleton, A. E., and Henderson, J. P. (2012) The siderophore yersiniabactin binds copper to protect pathogens during infection, *Nat Chem Biol*.
